# Supplementary material
Source: PubMed Central journal article supplement (PMC10841081)
Supplement: NIHMS1931796-supplement-1.pdf [file NIHMS1931796-supplement-1.pdf]

### Multiple Regressions: Associations Between Baseline TTV and Disability Measures

| Predictor                             |                | EDSS         | LCVA-25      | SDMT             | T25FW        | 9-HPT   | MSFC-4           |
|---------------------------------------|----------------|--------------|--------------|------------------|--------------|---------|------------------|
| Thalamic volume — mm <sup>3</sup>     | $\beta$        | 0.241        | 4.767        | 3.878            | 1.381        | -1.479  | 0.120            |
|                                       | <i>P-value</i> | 0.706        | 0.510        | <b>&lt;0.001</b> | 0.868        | 0.762   | <b>0.003</b>     |
| Treatment group (Placebo)             | $\beta$        | -0.244       | -2.388       | -1.344           | 0.596        | 6.528   | -0.152           |
|                                       | <i>P-value</i> | 0.104        | 0.286        | 0.395            | 0.760        | 0.567   | 0.109            |
| MS Subtype (SPMS)                     | $\beta$        | 0.322        | -2.285       | 2.012            | 4.927        | 1.202   | -0.207           |
|                                       | <i>P-value</i> | 0.090        | 0.286        | 0.314            | 0.047        | 0.934   | 0.084            |
| Disease duration                      | $\beta$        | 0.005        | -0.033       | 0.027            | 0.055        | 0.756   | <0.001           |
|                                       | <i>P-value</i> | 0.600        | 0.742        | 0.770            | 0.631        | 0.260   | 0.993            |
| Age                                   | $\beta$        | -0.001       | -0.129       | -0.271           | -0.268       | -1.997  | 0.002            |
|                                       | <i>P-value</i> | 0.951        | 0.304        | 0.021            | 0.064        | 0.019   | 0.729            |
| Sex (Female)                          | $\beta$        | -0.027       | 0.756        | 7.415            | 0.811        | -10.706 | 0.397            |
|                                       | <i>P-value</i> | 0.874        | 0.322        | <b>&lt;0.001</b> | 0.714        | 0.408   | <b>&lt;0.001</b> |
| Ethnicity (Not hispanic)              | $\beta$        | 0.016        | 0.756        | 10.260           | -6.885       | 18.647  | 0.288            |
|                                       | <i>P-value</i> | 0.971        | 0.875        | 0.023            | 0.215        | 0.566   | 0.284            |
| Intracranial volume — mm <sup>3</sup> | $\beta$        | <0.001       | 0.001        | < -0.001         | < -0.001     | -0.005  | <0.001           |
|                                       | <i>P-value</i> | 0.518        | 0.610        | 0.973            | 0.496        | 0.537   | 0.588            |
| Overall P-value                       |                | <b>0.007</b> | <b>0.002</b> | <b>&lt;0.001</b> | <b>0.006</b> | 0.925   | <b>&lt;0.001</b> |
| F statistic                           |                | 1.805        | 1.992        | 6.262            | 1.836        | 0.658   | 3.172            |
| Adjusted R-squared                    |                | 0.113        | 0.135        | 0.453            | 0.116        | 0.057   | 0.255            |

**Supplemental Table 1:** Associations Between Baseline TTV and Disability Measures. Significant p-values shown in bold, determined using Bonferroni correction for 6 outcomes ( $p < 0.008$ ). For interpretability, thalamic volumes are scaled by  $10^3$  for SDMT, 9-HPT, and MSFC-4; and by  $10^4$  for EDSS, LCVA-25 and T25FW.
